# Supplementary material for: GC-MS analysis of phytochemical compounds of Opuntia megarrhiza (Cactaceae), an endangered plant of Mexico
Source: PeerJ journal article supplement (doi:10.7717/peerj-ochem.5), 2022-03-22
Supplement: SupplFigs_220214.pdf [file SupplFigs_220214.pdf]

A)

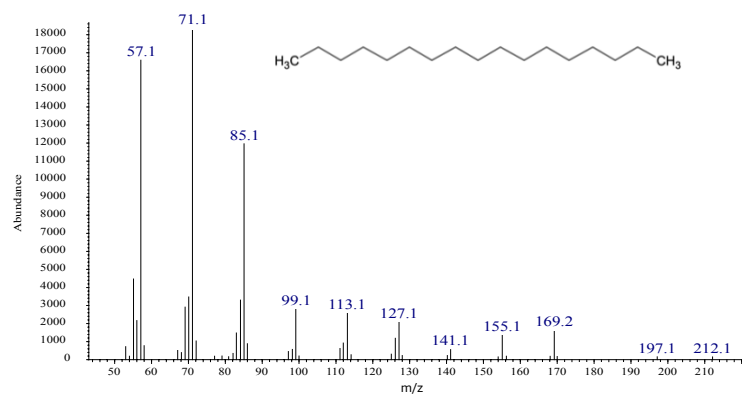

B)

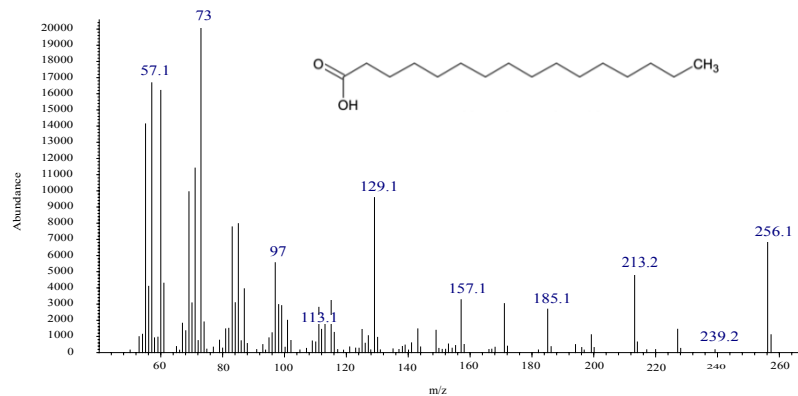

C)

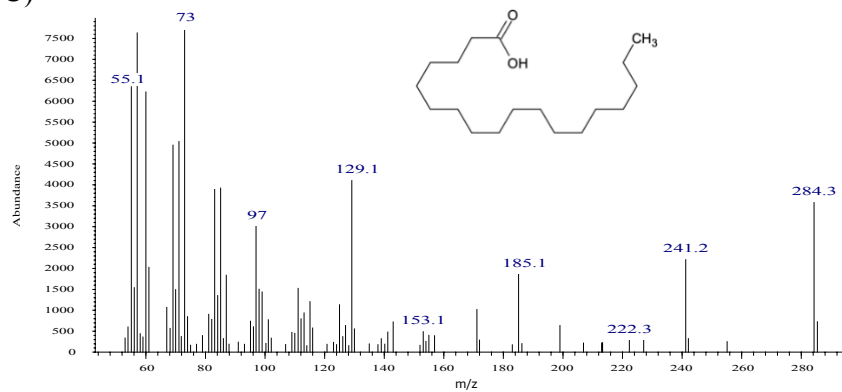

**Figure S1.** Mass spectra and chemical structure of compounds with biological activity identified by GC-MS in MeOH extract with PVDF membrane filter. A) heptadecane; B) hexadecanoic acid; C) octadecanoic acid. For details see Table 6.

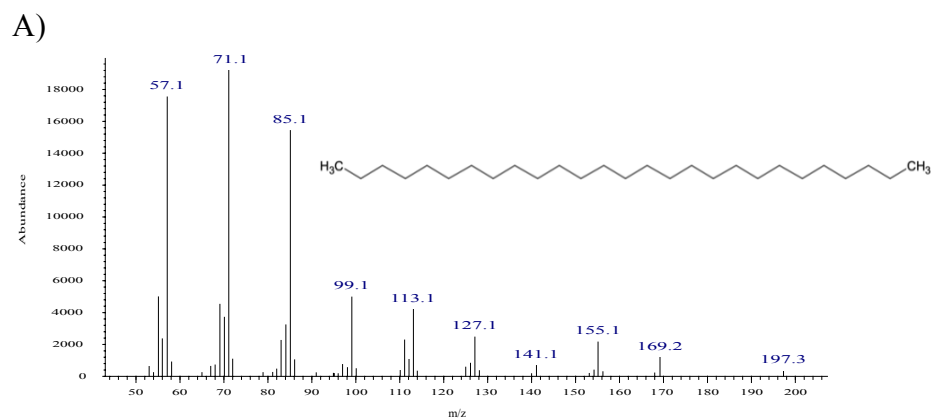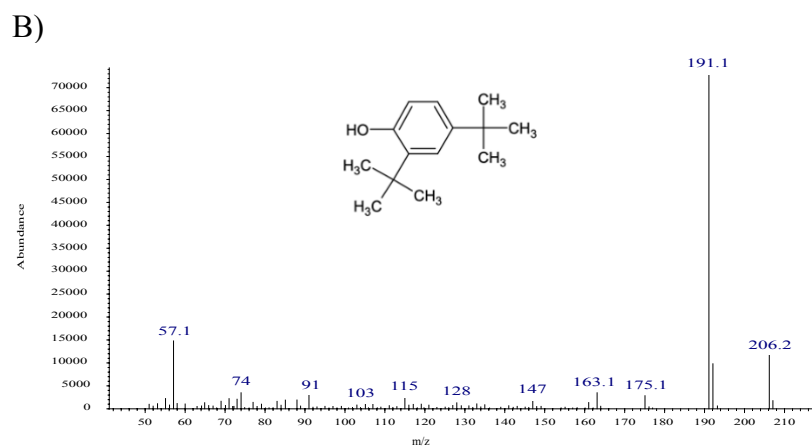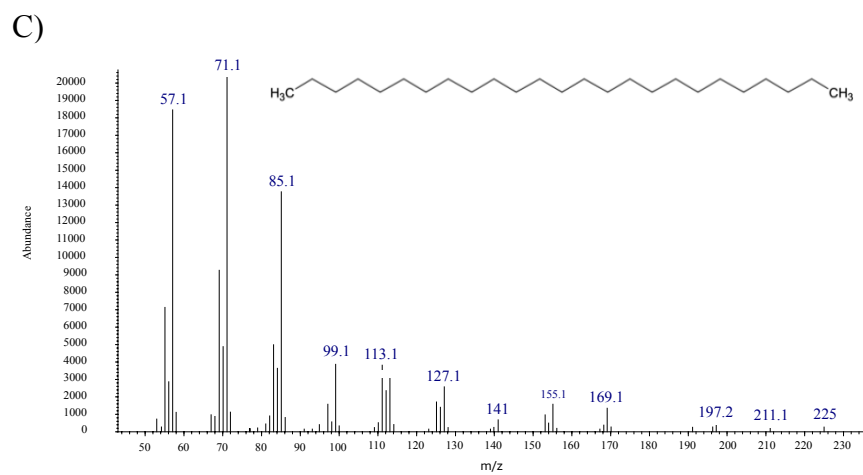

**Figure S2.** Mass spectra and chemical structures of compounds with biological activity identified by GC-MS in MeOH extract with PTFE membrane filter. A) heptacosane, B) 2,4-ditert-butylphenol; C) pentacosane; D) heneicosane; E) triacontane; F) hentriacontane; G) octacosane. For details see Table 6.

D)

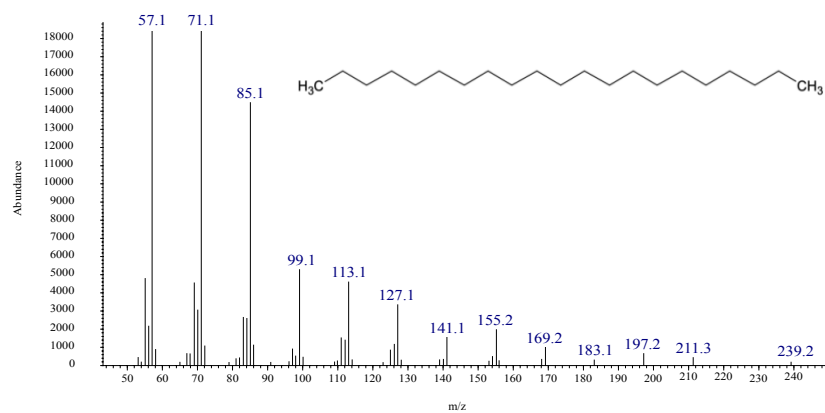

E)

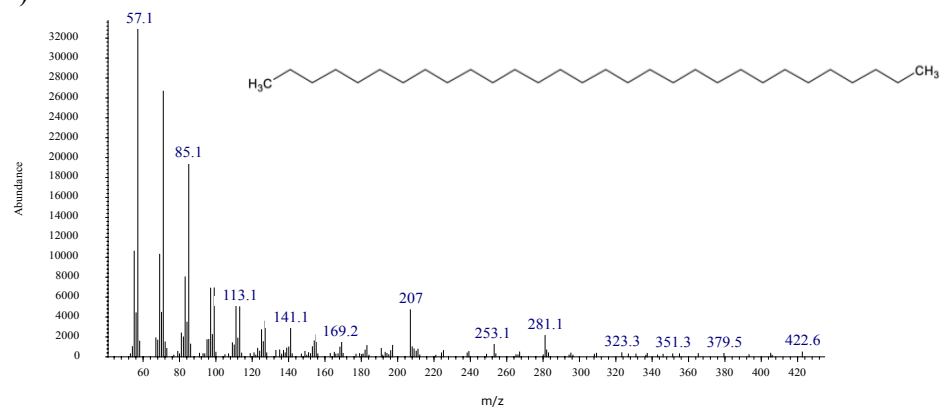

F)

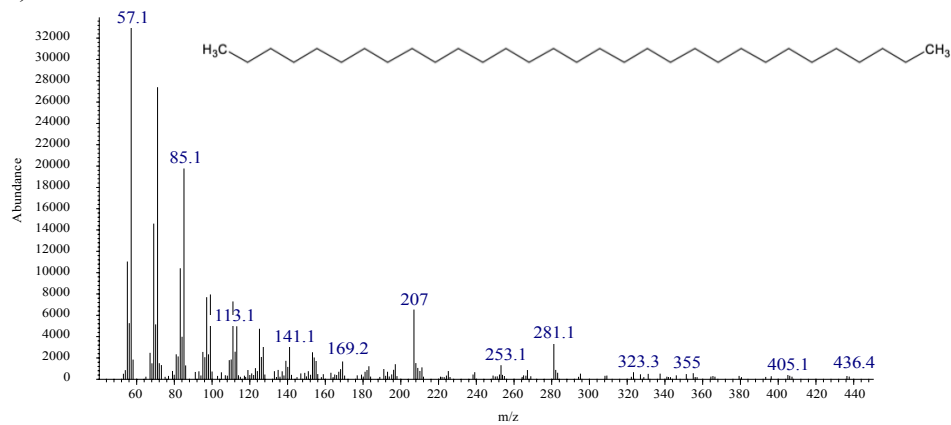

Figure S2. (continued)

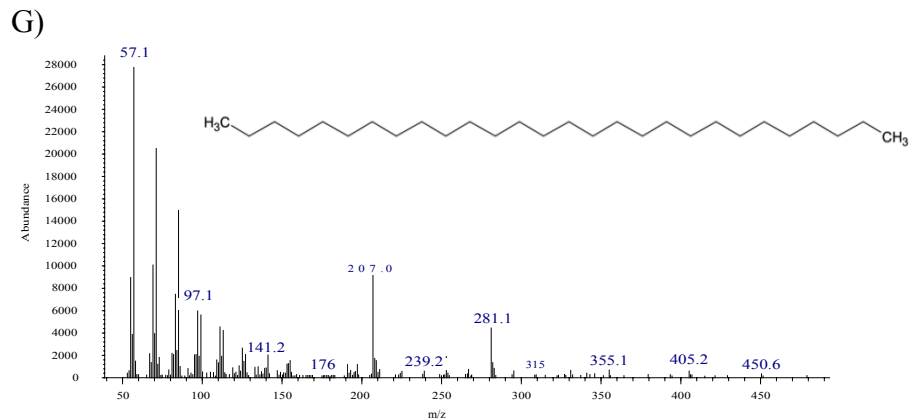

**Figure S2.** (continued)

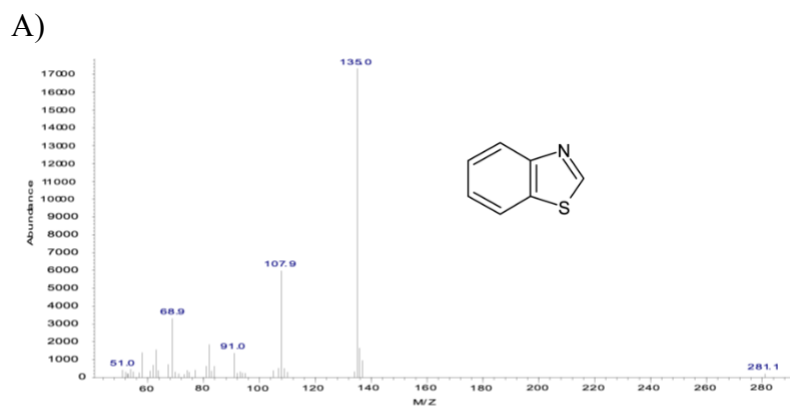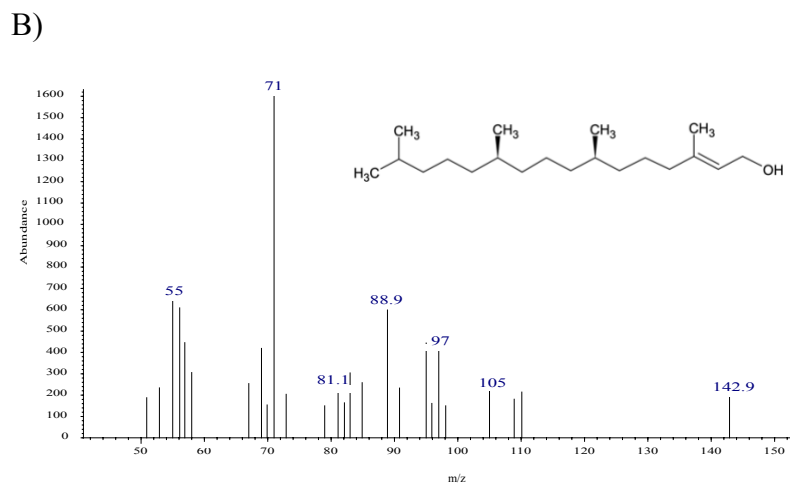

**Figure S3.** Mass spectra and chemical structures of compounds with biological activity identified by GC-MS in  $\text{CHCl}_3$  extract with PVDF membrane filter. A) 1,3-benzothiazole; B) (*E,7R,11R*)-3,7,11,15-tetramethylhexadec-2-en-1-ol; C) 7,9-ditert-butyl-1-oxaspiro[4.5]deca-6,9-diene-2,8-dione; D) methyl hexadecanoate; E) methyl octadecanoate; F) butyl hexadecanoate; G) icosane. For details see Table 7.

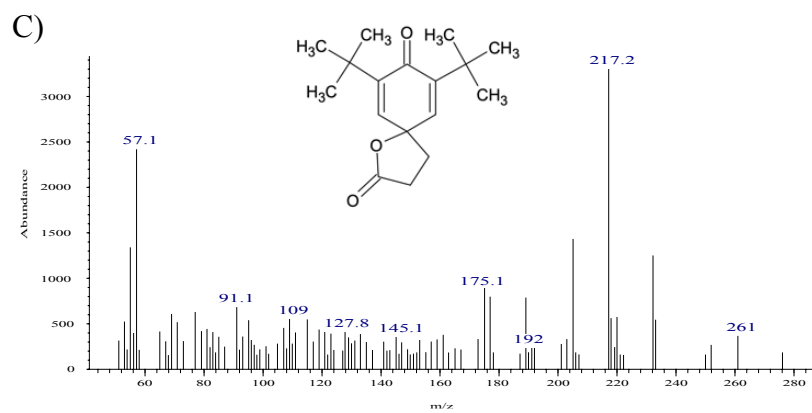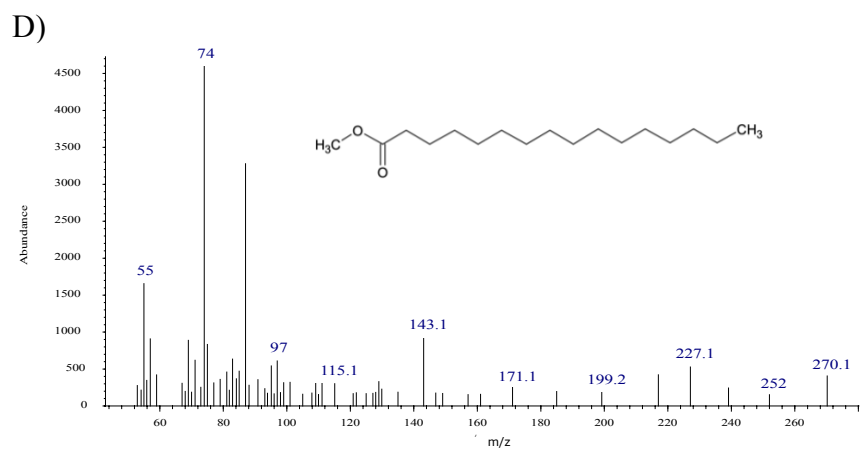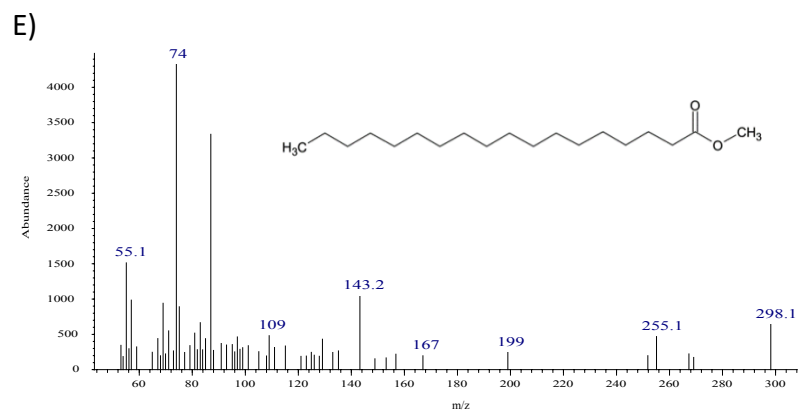

Figure S3. (continued)

F)

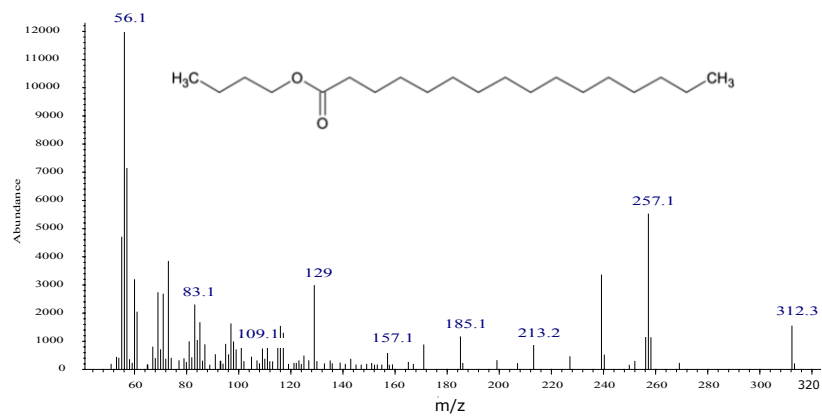

G)

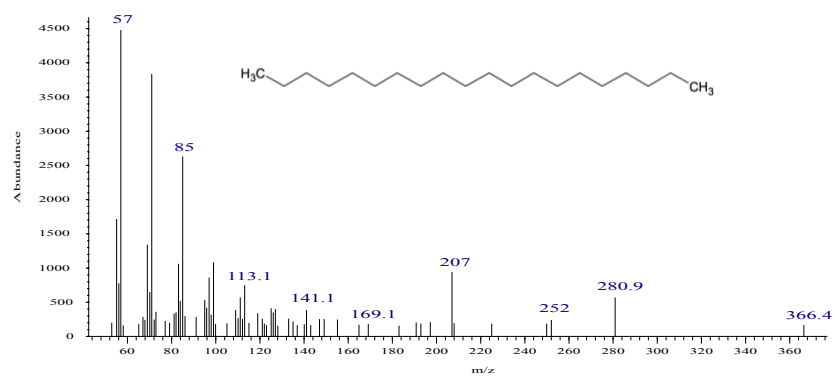

Figure S3. (continued)

A)

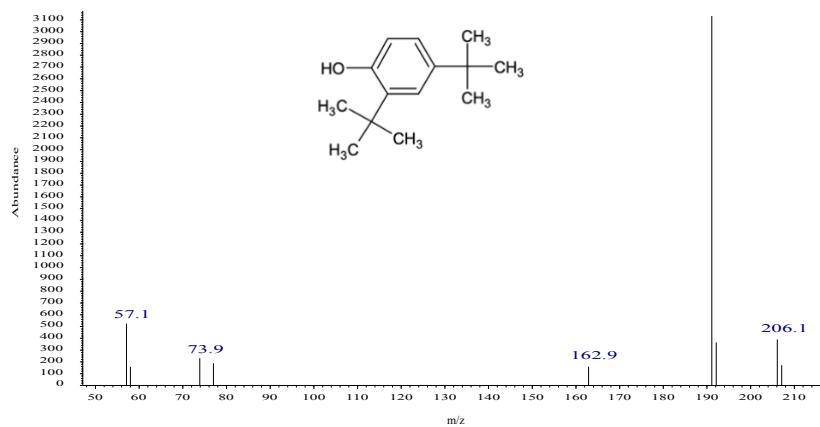

B)

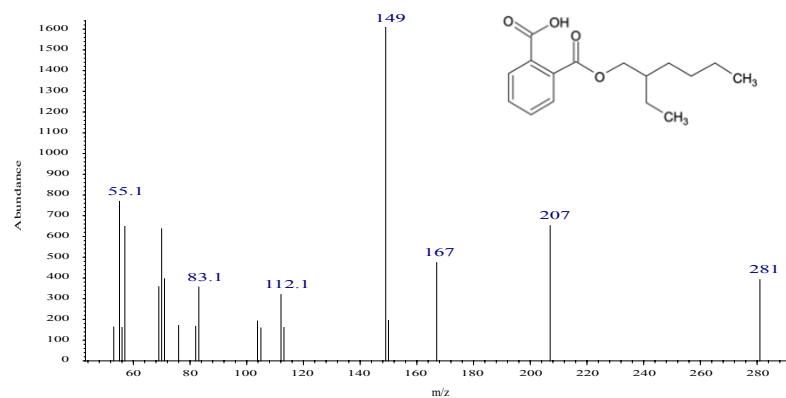

**Figure S4.** Mass spectra and chemical structures of compounds with biological activity identified by GC-MS in  $\text{CHCl}_3$  extract with PTFE membrane filter. A) 2,4-ditert-butylphenol; B) 2-(2-ethylhexoxycarbonyl)benzoic acid. For details see Table 7.

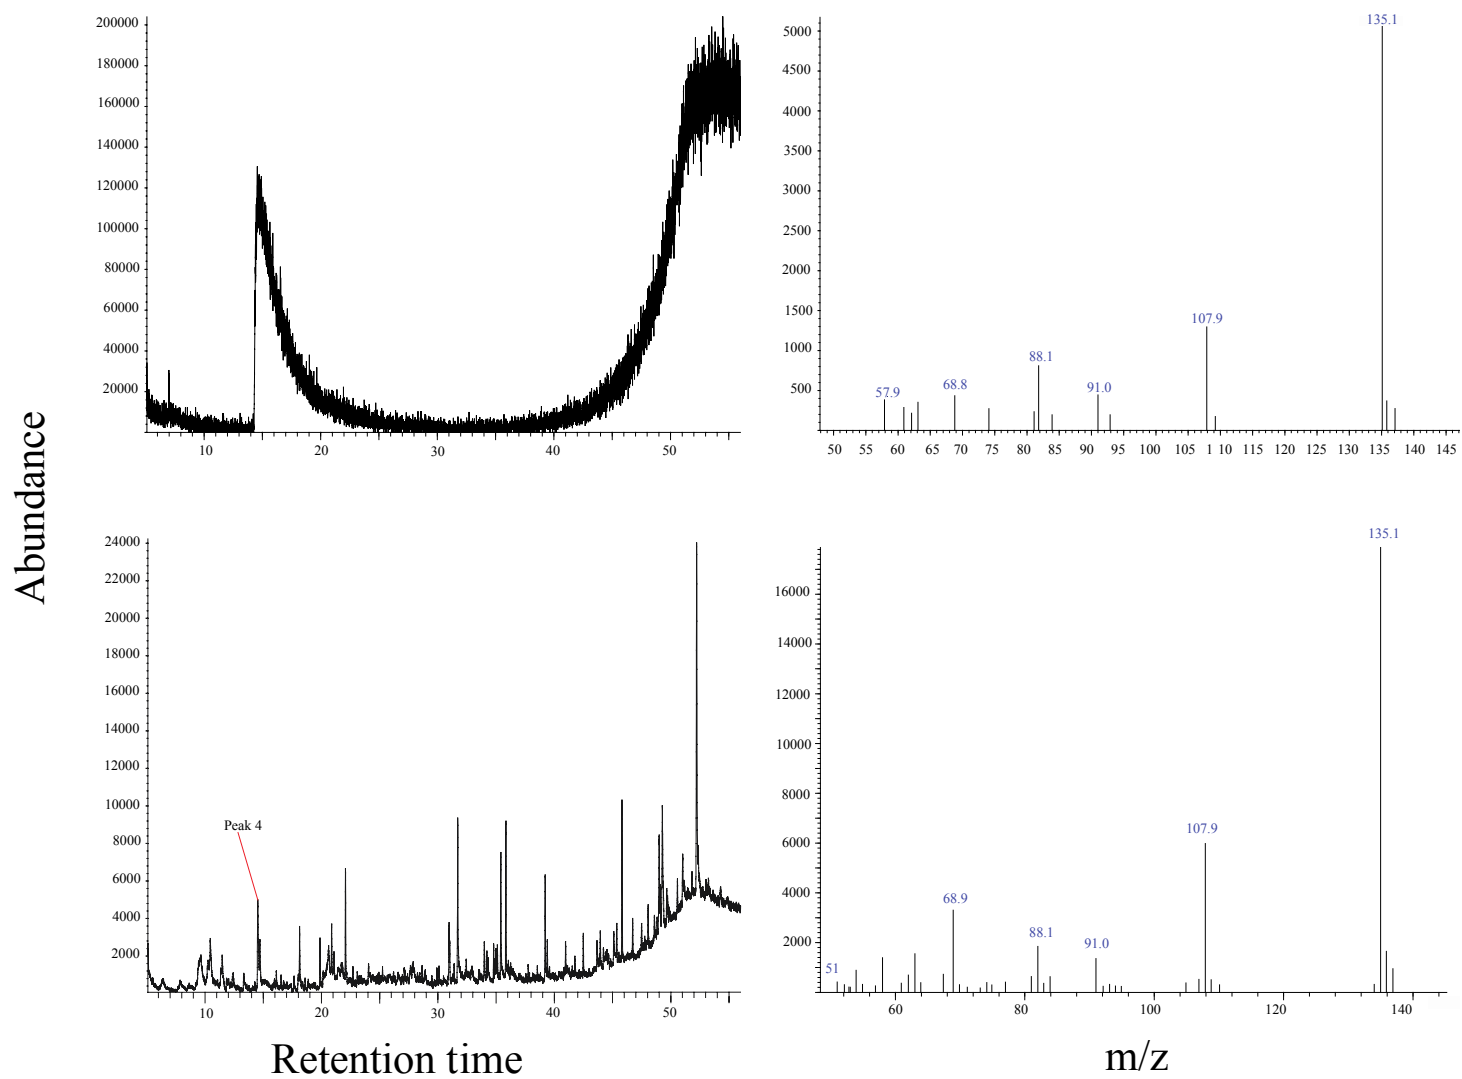

**Figure S5.** Chromatogram and mass spectra of standards of 1,3-benzothiazole (RT:14.61) and experimental in  $\text{CHCl}_3$  extract with PVDF membrane filter (RT: 14.53).



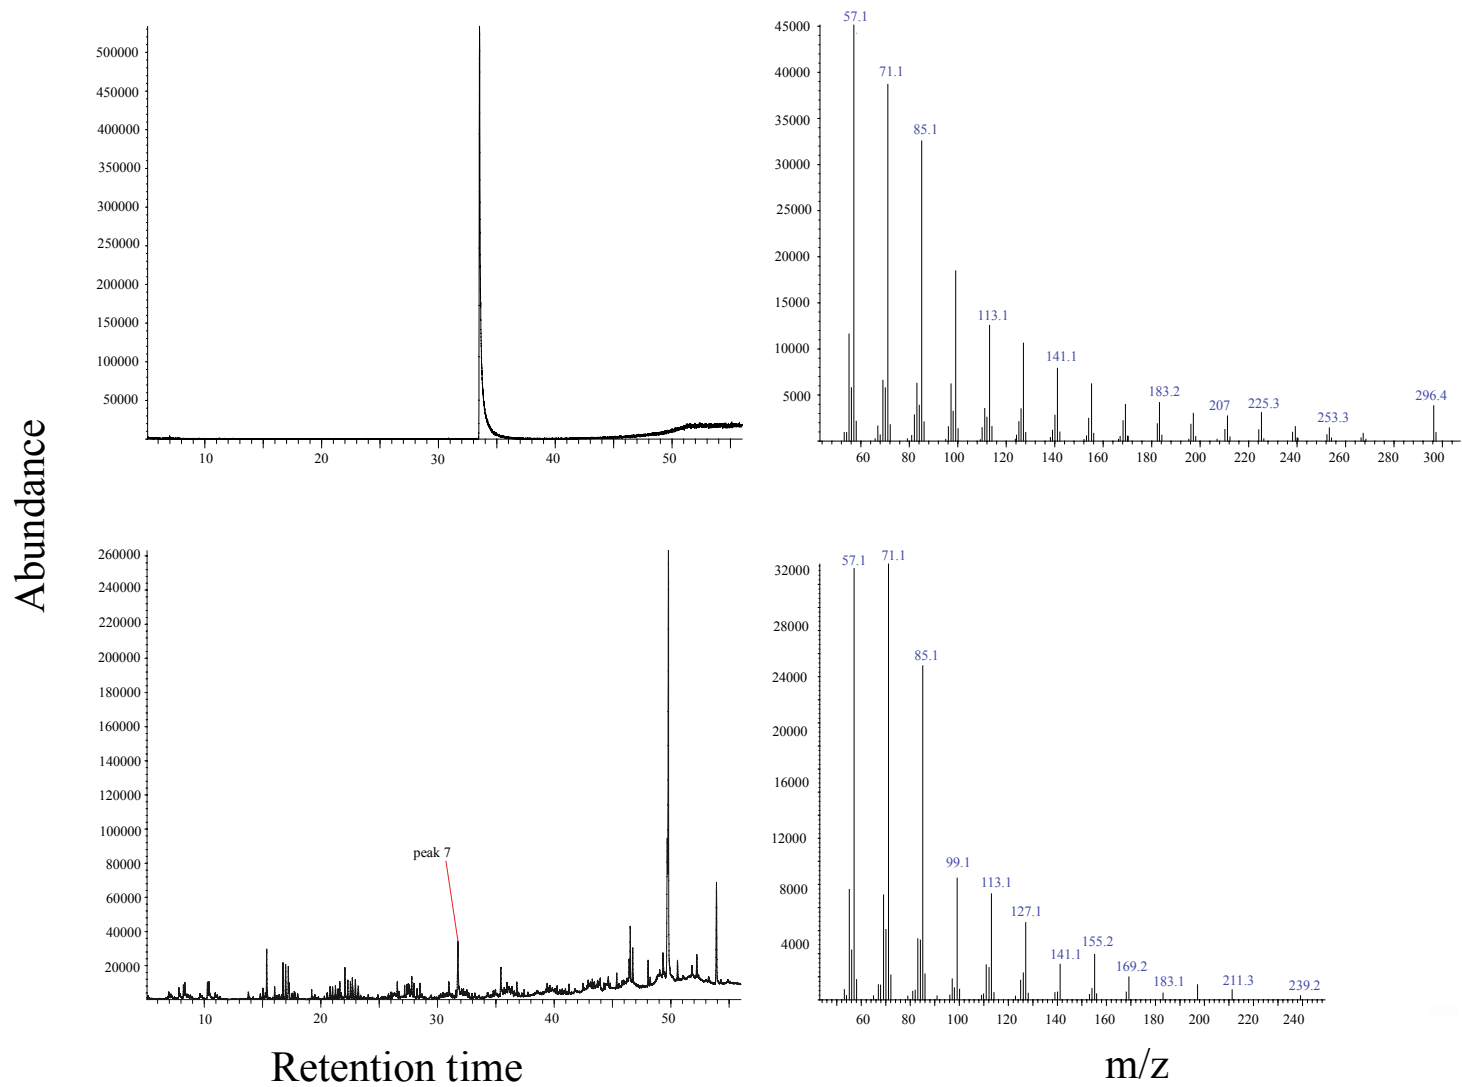

**Figure S6.** Chromatogram and mass spectra of standards of heneicosane (RT: 33.55) and experimental in MeOH extract with PTFE membrane filter (RT: 32.89).

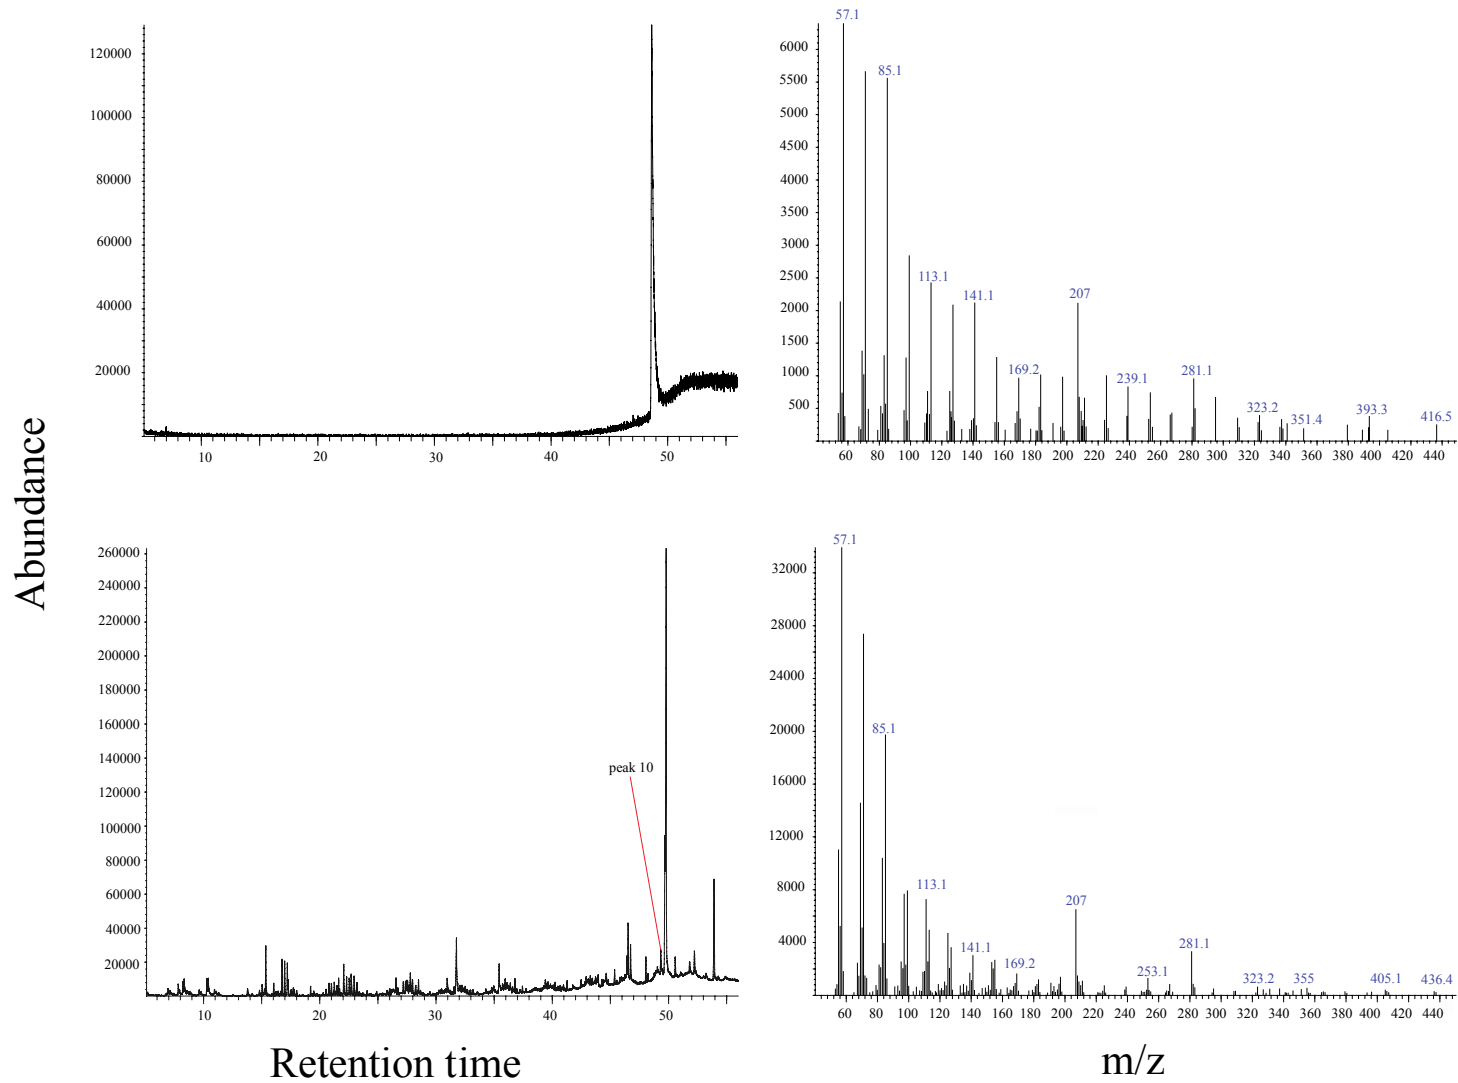

**Figure S7.** Chromatogram and mass spectra of standards of hentriacontane (RT: 48.75) and experimental in MeOH extract with PTFE membrane filter (RT: 48.04).

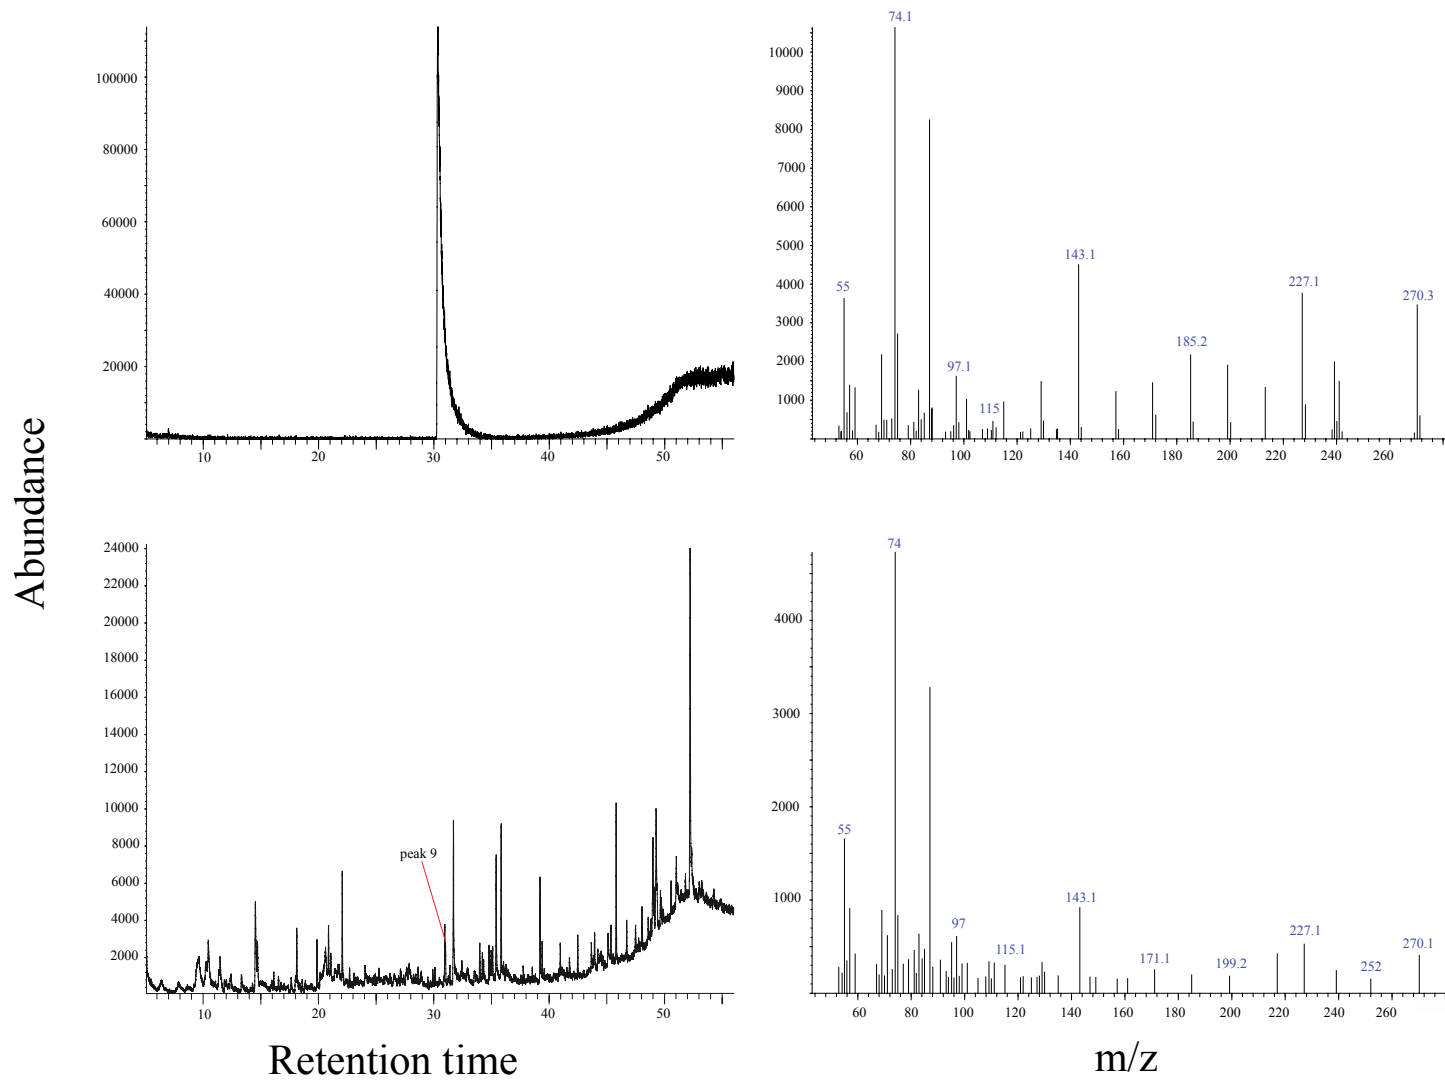

**Figure S8.** Chromatogram and mass spectra of standards of methyl hexadecanoate (RT: 30.52) and experimental in  $\text{CHCl}_3$  extract with PVDF membrane filter (RT: 31.01).

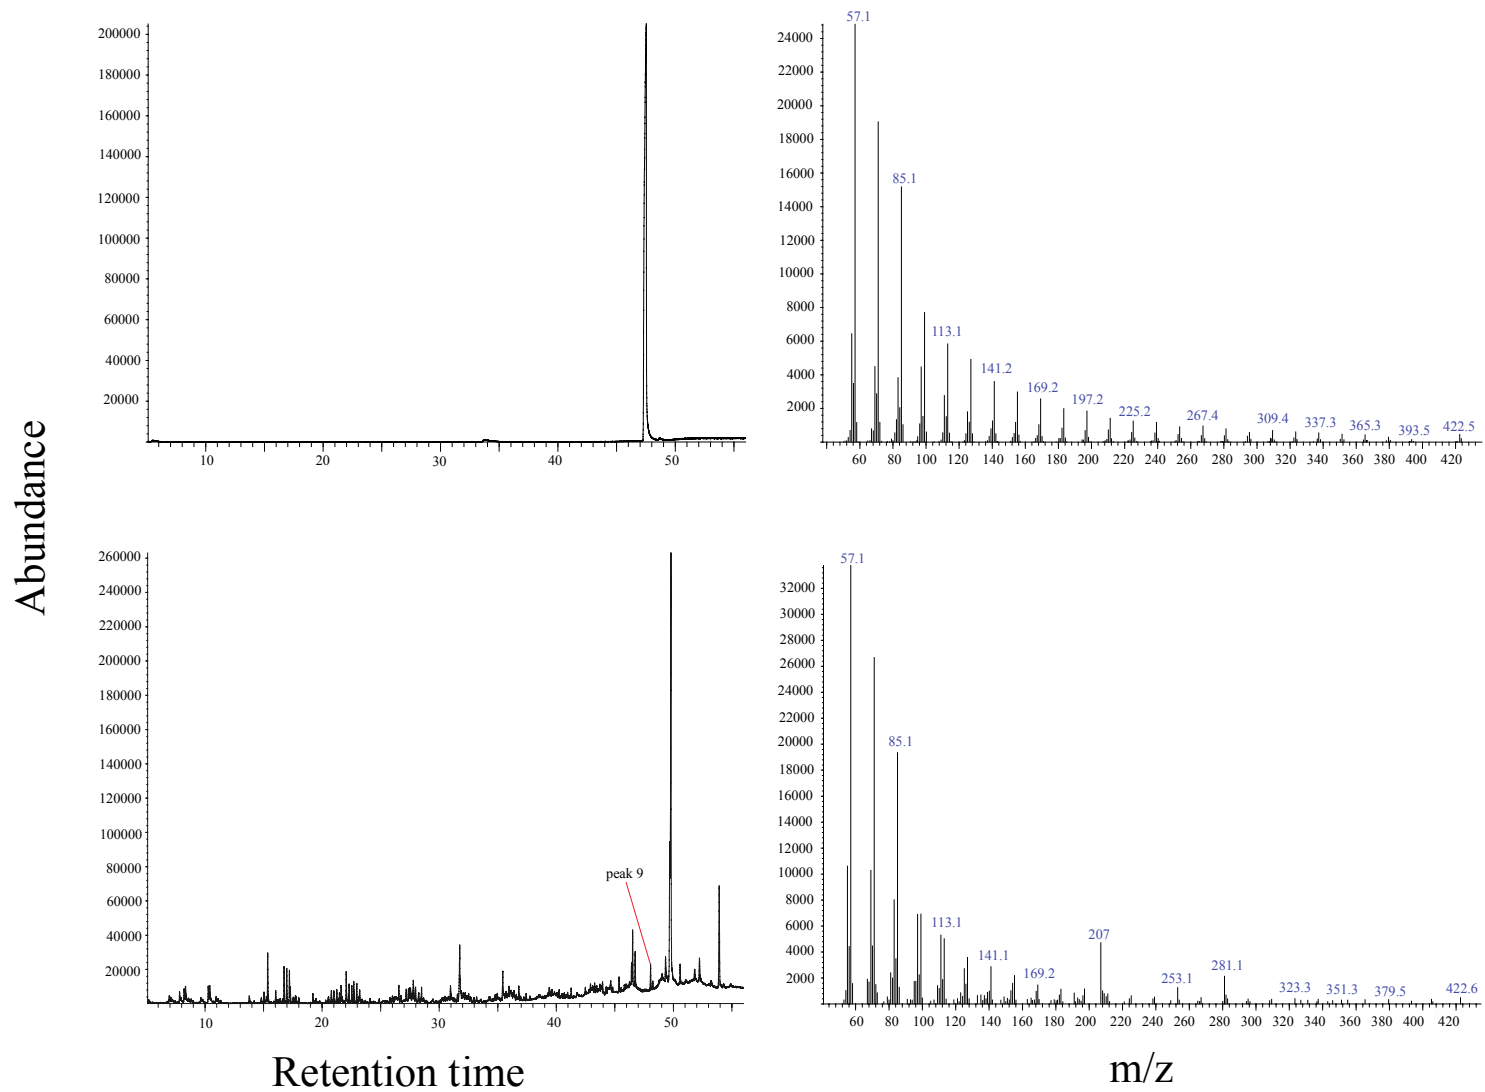

**Figure S9.** Chromatogram and mass spectra of standards of triacontane (RT: 47.43) and experimental in MeOH extract with PTFE membrane filter (RT: 48.04).
